# Supplementary material for: Transboundary transport of air pollution in eastern Canada
Source: Royal Society of Chemistry journal article supplement (doi:10.1039/d3va00307h), 2024-01-01
Supplement: d3va00307h1.pdf [file d3va00307h1.pdf]

**Table A1** : List of stations used for PSCF calculations.

| Station                         | NAPS ID | Latitude | Longitude | Pollutants                                                                         |
|---------------------------------|---------|----------|-----------|------------------------------------------------------------------------------------|
| Auclair                         | 052801  | 47.72    | -68.71    | PM <sub>2.5</sub> , O <sub>3</sub>                                                 |
| Saguenay - UQAC                 | 050504  | 48.42    | -71.05    | SO <sub>2</sub>                                                                    |
| Rés. Faun. Ashuapmushuan        | 053201  | 48.81    | -72.74    | PM <sub>2.5</sub>                                                                  |
| Québec - Vieux-Limoilou         | 050308  | 46.82    | -71.22    | PM <sub>2.5</sub> , CO, SO <sub>2</sub> , NO <sub>x</sub>                          |
| Lac-Édouard                     | 053901  | 47.63    | -72.29    | O <sub>3</sub>                                                                     |
| La Patrie                       | 054901  | 45.37    | -71.25    | PM <sub>2.5</sub> , O <sub>3</sub>                                                 |
| Montréal - Rivière Des Prairies | 050129  | 45.65    | -73.57    | PM <sub>2.5</sub> , CO, SO <sub>2</sub> ,<br>NO <sub>x</sub> , EC                  |
| Saint-Anicet                    | 054401  | 45.12    | -74.29    | PM <sub>2.5</sub> , CO, SO <sub>2</sub> , O <sub>3</sub> ,<br>NO <sub>x</sub> , EC |
| Gatineau - Hull                 | 050204  | 45.44    | -75.72    | PM <sub>2.5</sub> , CO, SO <sub>2</sub> , NO <sub>x</sub>                          |
| Parc de la Gatineau - La-Pêche  | 052401  | 45.62    | -76.02    | O <sub>3</sub>                                                                     |
| Rouyn-Noranda - Parc Tremblay   | 050604  | 48.23    | -78.98    | PM <sub>2.5</sub> , SO <sub>2</sub>                                                |
| Senneterre                      | 055101  | 48.43    | -77.20    | PM <sub>2.5</sub> , O <sub>3</sub>                                                 |
| Lemieux                         | 055201  | 46.30    | -72.06    | PM <sub>2.5</sub> , CO, O <sub>3</sub>                                             |
| L'Assomption                    | 054501  | 45.81    | -73.43    | CO                                                                                 |
| Varennnes                       | 052601  | 45.72    | -73.38    | NO <sub>x</sub>                                                                    |

**Table A2** : List of RSQAQ stations used to evaluate GEOS-Chem.

| Station                              | NAPS ID | Latitude | Longitude | Pollutants                                                                  |
|--------------------------------------|---------|----------|-----------|-----------------------------------------------------------------------------|
| Auclair                              | 052801  | 47.72    | -68.71    | PM <sub>2.5</sub> , O <sub>3</sub>                                          |
| Saguenay - UQAC                      | 050504  | 48.42    | -71.05    | PM <sub>2.5</sub> , O <sub>3</sub>                                          |
| Rés. Faun. Ashuapmushuan - Pemonca   | 053201  | 48.81    | -72.74    | PM <sub>2.5</sub> , O <sub>3</sub>                                          |
| Québec - Vieux-Limoilou              | 050308  | 46.82    | -71.22    | PM <sub>2.5</sub> , O <sub>3</sub> , NO <sub>x</sub> , SO <sub>2</sub> , CO |
| Québec - École Les Primevères        | 050311  | 46.77    | -71.37    | PM <sub>2.5</sub> , O <sub>3</sub> , NO <sub>x</sub>                        |
| Québec - Collège St-Charles-Garnier  | 050310  | 46.79    | -71.25    | PM <sub>2.5</sub> , O <sub>3</sub> , NO <sub>x</sub>                        |
| Saint-François-de-l'Île-d'Orléans    | 053501  | 47.02    | -70.86    | O <sub>3</sub>                                                              |
| Deschambault                         | 053301  | 46.68    | -71.97    | PM <sub>2.5</sub> , O <sub>3</sub>                                          |
| Notre-Dame-Du-Rosaire                | 053601  | 46.85    | -70.45    | PM <sub>2.5</sub> , O <sub>3</sub>                                          |
| Saint-Hilaire-de-Dorset              | 053701  | 45.82    | -70.86    | PM <sub>2.5</sub> , O <sub>3</sub>                                          |
| Trois-Rivières - Cap-de-la-Madeleine | 055401  | 46.36    | -72.51    | SO <sub>2</sub>                                                             |
| Bécancour                            | 054703  | 46.35    | -72.43    | PM <sub>2.5</sub> , SO <sub>2</sub>                                         |
| Saint-Zéphirin-de-Courval            | 051501  | 46.04    | -72.66    | PM <sub>2.5</sub> , O <sub>3</sub>                                          |
| Tingwick                             | 053801  | 45.91    | -71.95    | PM <sub>2.5</sub> , O <sub>3</sub>                                          |
| Charette                             | 052001  | 46.44    | -72.89    | PM <sub>2.5</sub> , O <sub>3</sub>                                          |
| Lac-Édouard                          | 053901  | 47.63    | -72.29    | PM <sub>2.5</sub> , O <sub>3</sub>                                          |
| Sherbrooke - Parc Cambron            | 050404  | 45.41    | -71.87    | PM <sub>2.5</sub> , O <sub>3</sub>                                          |
| La Patrie                            | 054901  | 45.37    | -71.25    | PM <sub>2.5</sub> , O <sub>3</sub>                                          |
| Montréal - Saint-Jean-Baptiste       | 050103  | 45.64    | -73.50    | PM <sub>2.5</sub> , O <sub>3</sub> , NO <sub>x</sub> , SO <sub>2</sub>      |
| Montréal - Rivière Des Prairies      | 050129  | 45.65    | -73.57    | PM <sub>2.5</sub> , O <sub>3</sub> , NO <sub>x</sub> , CO, EC               |
| Montréal - Aéroport de Montréal      | 050128  | 45.47    | -73.74    | PM <sub>2.5</sub> , O <sub>3</sub> , NO <sub>x</sub> , CO                   |
| Montréal - Saint-Joseph              | 050134  | 45.54    | -73.57    | PM <sub>2.5</sub> , O <sub>3</sub> , NO <sub>x</sub> , SO <sub>2</sub>      |
| Montréal - Sainte-Anne-De-Bellevue   | 050126  | 45.43    | -73.93    | PM <sub>2.5</sub> , O <sub>3</sub> , NO <sub>x</sub> , SO <sub>2</sub>      |
| Laval – Chomedey                     | 050113  | 45.55    | -73.75    | PM <sub>2.5</sub> , O <sub>3</sub> , NO <sub>x</sub> , CO                   |
| Saint-Faustin–Lac-Carré              | 052301  | 46.04    | -74.48    | PM <sub>2.5</sub> , O <sub>3</sub>                                          |
| Longueuil                            | 050119  | 45.52    | -73.49    | PM <sub>2.5</sub> , O <sub>3</sub> , NO <sub>x</sub>                        |
| Saint-Jean-sur-Richelieu - L'Acadie  | 055301  | 45.29    | -75.35    | PM <sub>2.5</sub> , O <sub>3</sub> , NO <sub>x</sub>                        |
| Saint-Simon                          | 052201  | 45.72    | -72.84    | PM <sub>2.5</sub> , O <sub>3</sub>                                          |
| Saint-Anicet                         | 054401  | 45.12    | -74.29    | PM <sub>2.5</sub> , O <sub>3</sub> , SO <sub>2</sub> , CO, EC               |
| Gatineau - Hull                      | 050204  | 45.44    | -75.72    | PM <sub>2.5</sub> , O <sub>3</sub> , NO <sub>x</sub> , SO <sub>2</sub> , CO |
| Mont-St-Michel                       | 055001  | 46.77    | -75.43    | PM <sub>2.5</sub> , O <sub>3</sub>                                          |
| Parc de la Gatineau - La-Pêche       | 052401  | 45.62    | -76.02    | PM <sub>2.5</sub> , O <sub>3</sub>                                          |
| Senneterre                           | 055101  | 48.43    | -77.20    | PM <sub>2.5</sub> , O <sub>3</sub>                                          |

**Table A3** : List of RSQAQ stations excluded from GEOS-Chem evaluation.

| Station                              | NAPS ID | Latitude | Longitude |
|--------------------------------------|---------|----------|-----------|
| Saguenay - Parc Powell               | 050902  | 48.43    | -71.19    |
| Shawinigan - Saint-Marc              | 051201  | 46.55    | -72.74    |
| Montréal - Échangeur Décarie         | 050109  | 45.50    | -73.66    |
| Saint-Joseph-de-Sorel - École Martel | 051801  | 46.05    | -73.13    |
| Rouyn-Noranda - Parc Tremblay        | 050604  | 48.23    | -78.98    |
| Témiscaming                          | 052701  | 46.72    | -79.10    |
| Rouyn-Noranda - Mgr Rhéaume Est      | 08044*  | 48.24    | -79.02    |

\* This station is not part of the NAPS network, and therefore does not have a NAPS ID number. We list the RSQAQ ID number for this station instead.

**Table A4:** Percentage of trajectories missing for NO<sub>x</sub>.

| Station                            | NAPS ID | Annual  | Summer (JJA) | Winter (DJF) |
|------------------------------------|---------|---------|--------------|--------------|
| L'Assomption                       | 054501  | 16.52 % | 22.46 %      | 43.91 %      |
| Saint-Anicet                       | 054401  | 16.52 % | 22.46 %      | 43.91 %      |
| Varenes                            | 052601  | 16.52 % | 22.46 %      | 43.91 %      |
| Québec -<br>Vieux-Limoilou         | 050308  | 16.52 % | 22.46 %      | 43.91 %      |
| Gatineau - Hull                    | 050204  | 16.52 % | 22.46 %      | 43.91 %      |
| Montréal - Rivière Des<br>Prairies | 050129  | 16.52 % | 22.46 %      | 43.91 %      |

**Table A5:** Percentage of trajectories missing for SO<sub>2</sub>.

| Station                            | NAPS ID | Annual  | Summer (JJA) | Winter (DJF) |
|------------------------------------|---------|---------|--------------|--------------|
| Saint-Anicet                       | 054401  | 17.04 % | 22.96 %      | 45.08 %      |
| Gatineau - Hull                    | 050204  | 16.36 % | 22.02 %      | 43.91 %      |
| Montréal - Rivière Des<br>Prairies | 050129  | 16.52 % | 22.46 %      | 43.91 %      |
| Québec -<br>Vieux-Limoilou         | 050308  | 16.19 % | 22.46 %      | 43.51 %      |
| Rouyn-Noranda - Parc<br>Tremblay   | 050604  | 16.42 % | 22.46 %      | 43.07 %      |
| Saguenay - UQAC                    | 050504  | 16.52 % | 22.46 %      | 43.91 %      |

**Table A6:** Percentage of trajectories missing for O<sub>3</sub>.

| <b>Station</b>                 | <b>NAPS ID</b> | <b>Annual</b> | <b>Summer (JJA)</b> | <b>Winter (DJF)</b> |
|--------------------------------|----------------|---------------|---------------------|---------------------|
| Parc de la Gatineau - La-Pêche | 052401         | 16.24 %       | 23.66 %             | 43.70 %             |
| Senneterre                     | 055101         | 16.59 %       | 22.43 %             | 43.91 %             |
| Lac-Édouard                    | 053901         | 15.89 %       | 23.22 %             | 40.63 %             |
| Lemieux                        | 055201         | 18.31 %       | 22.46 %             | 48.76 %             |
| La Patrie                      | 054901         | 16.37 %       | 22.46 %             | 43.07 %             |
| Rés. Faun. Ashuapmushuan       | 053201         | 17.36 %       | 22.71 %             | 45.21 %             |
| Saint-Anicet                   | 054401         | 16.52 %       | 22.46 %             | 43.91 %             |
| Auclair                        | 052801         | 16.58 %       | 22.46 %             | 44.57 %             |

**Table A7:** Percentage of trajectories missing for PM<sub>2.5</sub>.

| <b>Station</b>                  | <b>NAPS ID</b> | <b>Annual</b> | <b>Summer (JJA)</b> | <b>Winter (DJF)</b> |
|---------------------------------|----------------|---------------|---------------------|---------------------|
| Gatineau - Hull                 | 050204         | 16.52 %       | 22.46 %             | 43.91 %             |
| Montréal - Rivière Des Prairies | 050129         | 16.52 %       | 22.46 %             | 43.91 %             |
| Rouyn-Noranda - Parc Tremblay   | 050604         | 16.52 %       | 22.46 %             | 43.91 %             |
| Québec - Vieux-Limoilou         | 050308         | 16.19 %       | 22.46 %             | 43.51 %             |
| Auclair                         | 052801         | 16.52 %       | 22.46 %             | 43.91 %             |
| Rés. Faun. Ashuapmushuan        | 053201         | 16.52 %       | 22.46 %             | 43.91 %             |
| La Patrie                       | 054901         | 16.71 %       | 22.47 %             | 44.32 %             |
| Lemieux                         | 055201         | 16.37 %       | 22.46 %             | 43.07 %             |
| Senneterre                      | 055101         | 16.59 %       | 22.43 %             | 43.91 %             |
| Saint-Anicet                    | 054401         | 16.52 %       | 22.46 %             | 43.91 %             |

**Table A8:** Percentage of trajectories missing for CO.

| <b>Station</b>                  | <b>NAPS ID</b> | <b>Annual</b> | <b>Summer (JJA)</b> | <b>Winter (DJF)</b> |
|---------------------------------|----------------|---------------|---------------------|---------------------|
| Montréal - Rivière Des Prairies | 050129         | 16.52 %       | 22.46 %             | 43.91 %             |
| Gatineau - Hull                 | 050204         | 16.52 %       | 22.46 %             | 43.91 %             |
| Québec - Vieux-Limoilou         | 050308         | 16.19 %       | 22.46 %             | 43.51 %             |
| Saint-Anicet                    | 054401         | 16.52 %       | 22.46 %             | 43.91 %             |
| L'Assomption                    | 054501         | 16.58 %       | 22.46 %             | 44.57 %             |
| Lemieux                         | 055201         | 16.37 %       | 22.46 %             | 43.07 %             |

**Table A9:** Percentage of trajectories missing for EC.

| <b>Station</b>                  | <b>NAPS ID</b> | <b>Annual</b> | <b>Summer (JJA)</b> | <b>Winter (DJF)</b> |
|---------------------------------|----------------|---------------|---------------------|---------------------|
| Montréal - Rivière Des Prairies | 050129         | 16.52 %       | 22.46 %             | 43.91 %             |
| Saint-Anicet                    | 054401         | 16.52 %       | 22.46 %             | 43.91 %             |

**Table A10:** Evaluation of the GEOS-Chem base case simulation against observations from the RSQAQ stations given in Table A2 for winter (December, January and February), spring (March, April, and May), summer (June, July and August), and fall (September, October, and November). The units of ME and MB are  $\mu\text{g m}^{-3}$  for  $\text{PM}_{2.5}$  and EC, ppm for CO, and ppb for all other species.

| Pollutant                                  | Season | ME    | NME [%] | MB     | NMB [%] |
|--------------------------------------------|--------|-------|---------|--------|---------|
| $\text{PM}_{2.5}$ [ $\mu\text{g m}^{-3}$ ] | winter | 2.70  | 34      | -0.871 | -11     |
|                                            | spring | 1.74  | 29      | -0.177 | -3      |
|                                            | summer | 1.73  | 23      | -0.421 | -6      |
|                                            | fall   | 1.96  | 33      | 0.554  | 9       |
| CO [ppm]                                   | winter | 0.058 | 24      | -0.045 | 19      |
|                                            | spring | 0.049 | 24      | -0.041 | -21     |
|                                            | summer | 0.043 | 21      | -0.029 | -14     |
|                                            | fall   | 0.055 | 26      | -0.054 | -26     |
| $\text{NO}_x$ [ppb]                        | winter | 7.10  | 52      | -6.93  | -50     |
|                                            | spring | 4.45  | 53      | -4.41  | -52     |
|                                            | summer | 2.95  | 48      | -2.91  | -47     |
|                                            | fall   | 4.67  | 46      | -4.55  | -45     |
| $\text{SO}_2$ [ppb]                        | winter | 0.468 | 46      | 0.052  | 5       |
|                                            | spring | 0.435 | 51      | -0.162 | -19     |
|                                            | summer | 0.438 | 82      | 0.223  | 42      |
|                                            | fall   | 0.535 | 75      | 0.306  | 43      |
| $\text{O}_3$ [ppb]                         | winter | 4.49  | 17      | 4.12   | 15      |
|                                            | spring | 5.54  | 16      | 5.34   | 16      |
|                                            | summer | 8.24  | 33      | 8.20   | 33      |
|                                            | fall   | 11.00 | 54      | 11.00  | 54      |
| EC [ $\mu\text{g m}^{-3}$ ]                | winter | 0.160 | 30      | -0.079 | -15     |
|                                            | spring | 0.103 | 29      | -0.047 | -13     |
|                                            | summer | 0.160 | 35      | -0.154 | -34     |
|                                            | fall   | 0.125 | 29      | -0.054 | -13     |

**Table A11:** Relative and absolute (ppb) differences between the sensitivity simulations and the base-case simulation O<sub>3</sub> concentrations, spatially averaged over a region that encompasses the locations of the RSQAQ stations and the large population centres (45° N to 49° N, 78.75° W to 68.75° W).

| Season | noQC   | noCA   | noUS   |
|--------|--------|--------|--------|
| winter | -2.2 % | -0.4 % | 4.3 %  |
|        | -0.733 | -0.138 | 1.441  |
| spring | 1.1 %  | 2.6 %  | 11.0 % |
|        | 0.42   | 1.046  | 4.379  |
| summer | 4.5 %  | 5.2 %  | 16.6 % |
|        | 1.368  | 1.601  | 5.099  |
| fall   | 0.4 %  | 2.5 %  | 12.8 % |
|        | 0.131  | 0.819  | 4.236  |

**Table A12:** Percentage of the area of Quebec exceeding the 2020 Canadian Ambient Air Quality Standards annual PM<sub>2.5</sub> concentration threshold of 8.8 µg m<sup>-3</sup> in each simulation.

| Year | Base Case | noQC   | noRoC  | noUS   |
|------|-----------|--------|--------|--------|
| 2012 | 0.7 %     | 0.2 %  | 0.3 %  | 0.0 %  |
| 2013 | 11.7 %    | 10.9 % | 11.2 % | 11.1 % |
| 2014 | 0.2 %     | 0.0 %  | 0.0 %  | 0.0 %  |
| 2015 | 0.2 %     | 0.0 %  | 0.0 %  | 0.0 %  |
| 2016 | 0.2 %     | 0.0 %  | 0.0 %  | 0.0 %  |

**Table A13:** Percentage of the area of Quebec exceeding the World Health Organization (WHO) air quality guidelines annual PM<sub>2.5</sub> concentration threshold of 5.0 µg m<sup>-3</sup> in each simulation.

| Year | Base Case | noQC   | noRoC  | noUS   |
|------|-----------|--------|--------|--------|
| 2012 | 4.3 %     | 0.3 %  | 3.5 %  | 2.0 %  |
| 2013 | 31.1 %    | 24.3 % | 29.2 % | 26.4 % |
| 2014 | 3.7 %     | 0.0 %  | 2.8 %  | 1.3 %  |
| 2015 | 3.8 %     | 0.0 %  | 3.2 %  | 1.5 %  |
| 2016 | 2.7 %     | 0.0 %  | 1.5 %  | 1.2 %  |

**Table A14:** Percentage of the population of Quebec exceeding the 2020 Canadian Ambient Air Quality Standards annual PM<sub>2.5</sub> concentration threshold of 8.8 µg m<sup>-3</sup> in each simulation.

| Year | Base Case | noQC  | noRoC  | noUS  |
|------|-----------|-------|--------|-------|
| 2012 | 49.5 %    | 0.0 % | 39.0 % | 0.0 % |
| 2013 | 49.5 %    | 0.0 % | 39.0 % | 0.0 % |
| 2014 | 39.0 %    | 0.0 % | 0.0 %  | 0.0 % |
| 2015 | 39.0 %    | 0.0 % | 0.0 %  | 0.0 % |
| 2016 | 39.0 %    | 0.0 % | 0.0 %  | 0.0 % |

**Table A15:** Percentage of the population of Quebec exceeding the World Health Organization (WHO) air quality guidelines annual PM<sub>2.5</sub> concentration threshold of 5.0 µg m<sup>-3</sup> in each simulation.

| Year | Base Case | noQC  | noRoC  | noUS   |
|------|-----------|-------|--------|--------|
| 2012 | 88.2 %    | 0.0 % | 86.6 % | 68.4 % |
| 2013 | 91.9 %    | 0.2 % | 91.0 % | 72.9 % |
| 2014 | 87.7 %    | 0.0 % | 84.8 % | 60.0 % |
| 2015 | 87.9 %    | 0.0 % | 86.6 % | 61.6 % |
| 2016 | 85.1 %    | 0.0 % | 61.6 % | 58.5 % |



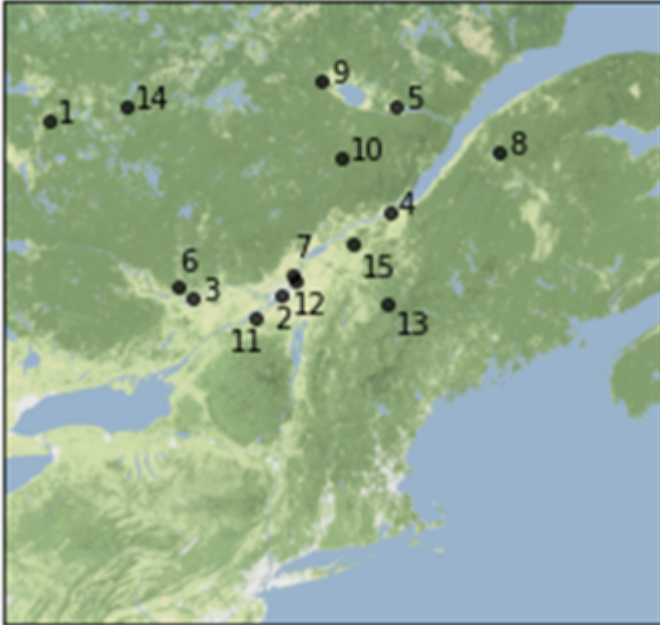

**Figure A1:** Locations of stations used for the PSCF analysis: 1. Rouyn-Noranda, 2. Montréal, 3. Gâtineau - Hull, 4. Québec, 5. Saguenay, 6. La Peche, 7. Varennes, 8. Auclair, 9. Rés. Faun. Ashuapmushuan, 10. Lac-Edouard, 11. Saint-Anicet, 12. L'Assomption, 13. La Patrie, 14. Senneterre, 15. Lemieux

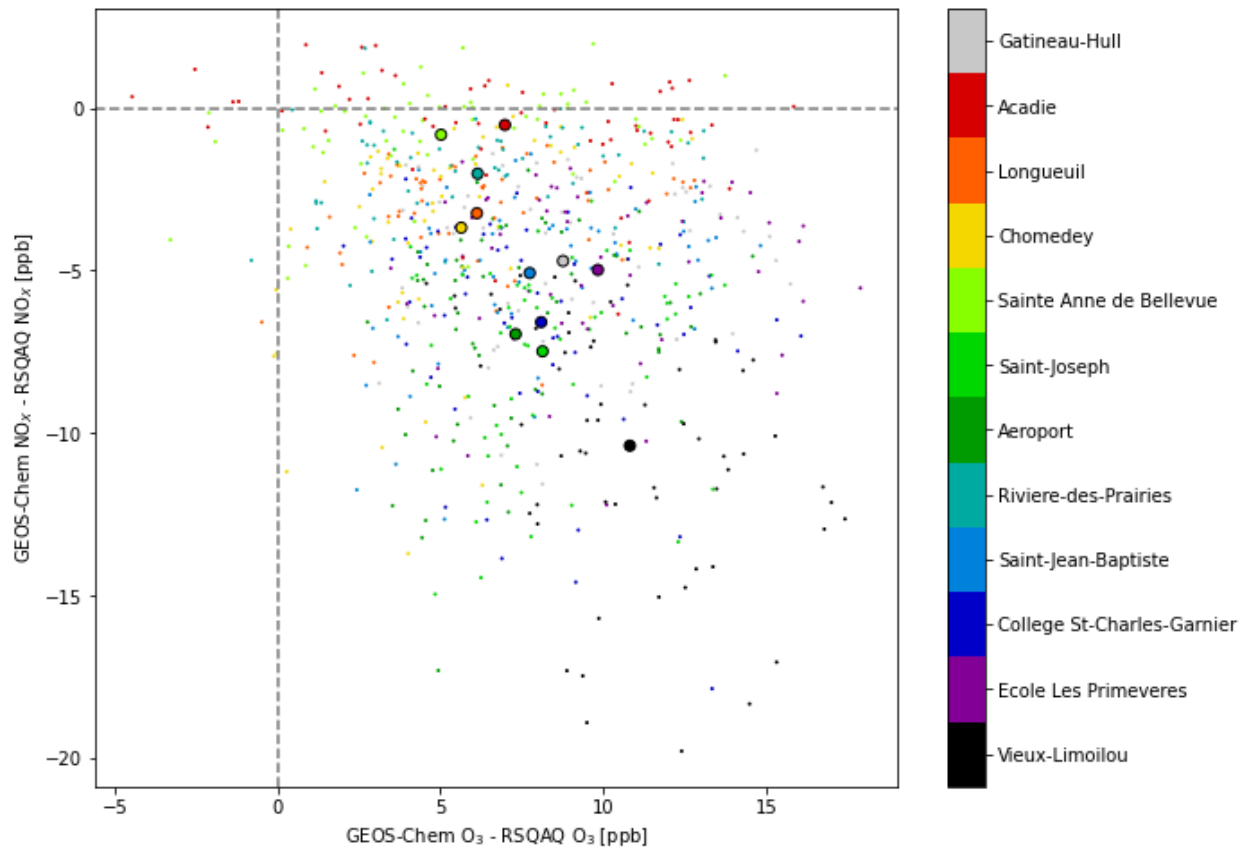

**Figure A2:** Scatterplot of model bias in  $\text{NO}_x$  concentrations vs. model bias in  $\text{O}_3$  concentrations. Temporal averages at each station are displayed as large dots.

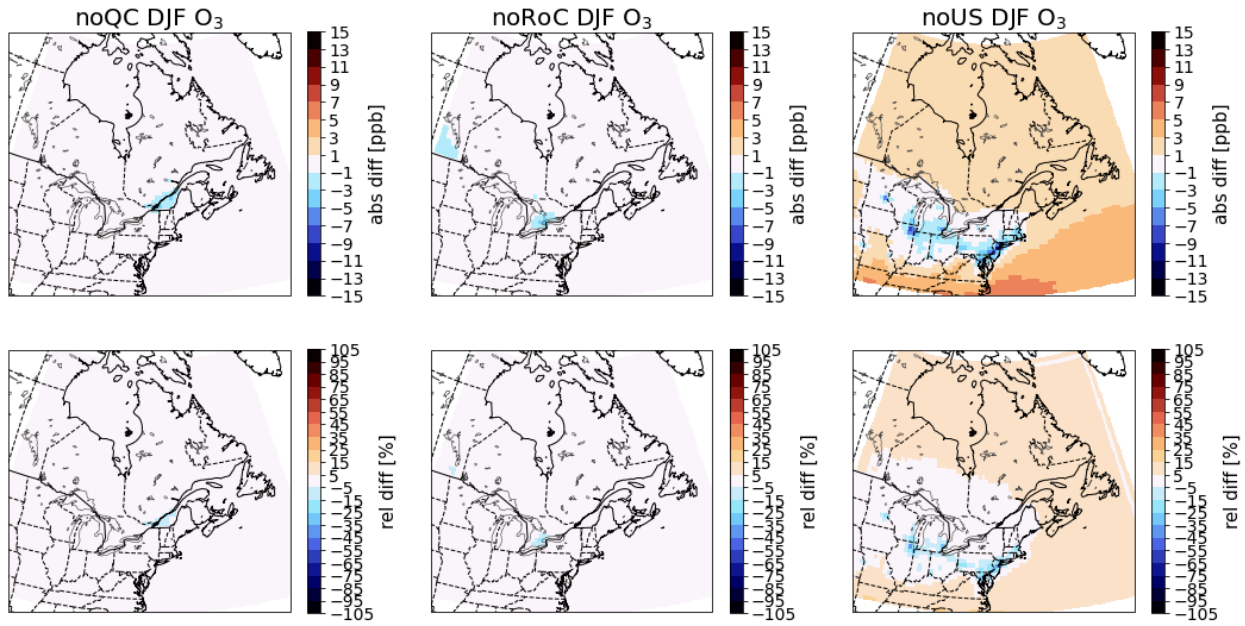

**Figure A3** : Differences in winter surface  $O_3$  concentrations between the sensitivity simulations and the base case simulation. Absolute differences are shown in the top row and relative differences in the bottom row. The three columns show the results of the noQC (left), noRoC (center) and noUS (right) sensitivity simulations.

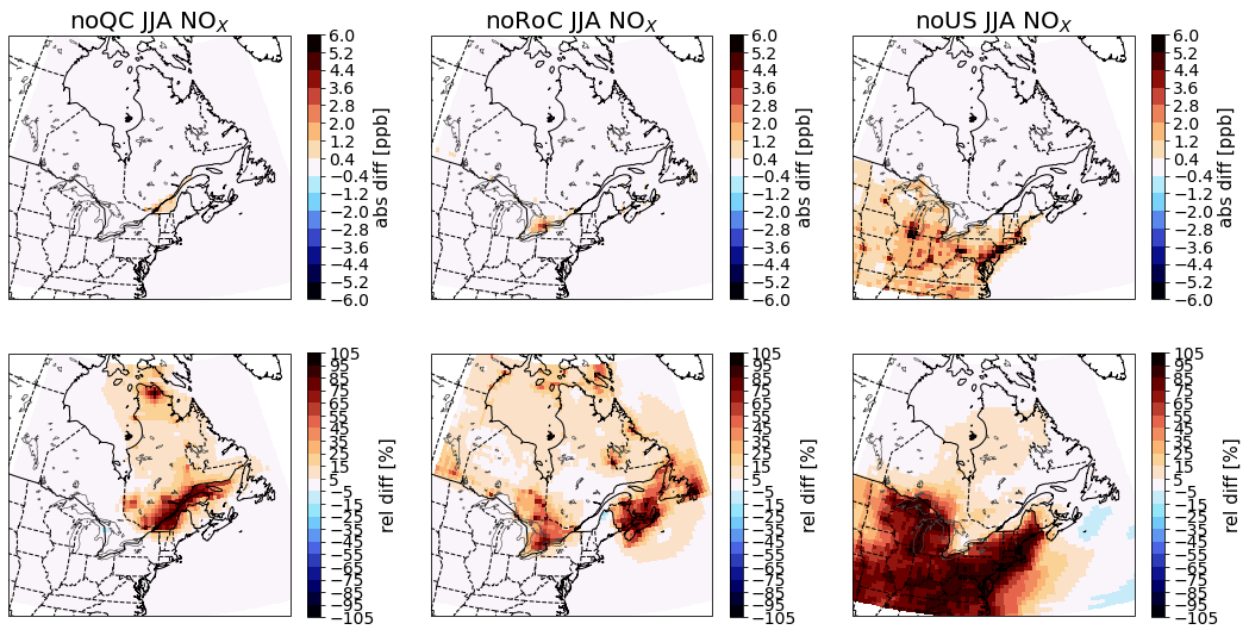

**Figure A4**: Differences in summer surface  $NO_x$  concentrations between the sensitivity simulations and the base case simulation. Absolute differences are shown in the top row and relative differences in the bottom row. The three columns show the results of the noQC (left), noRoC (center) and noUS (right) sensitivity simulations.

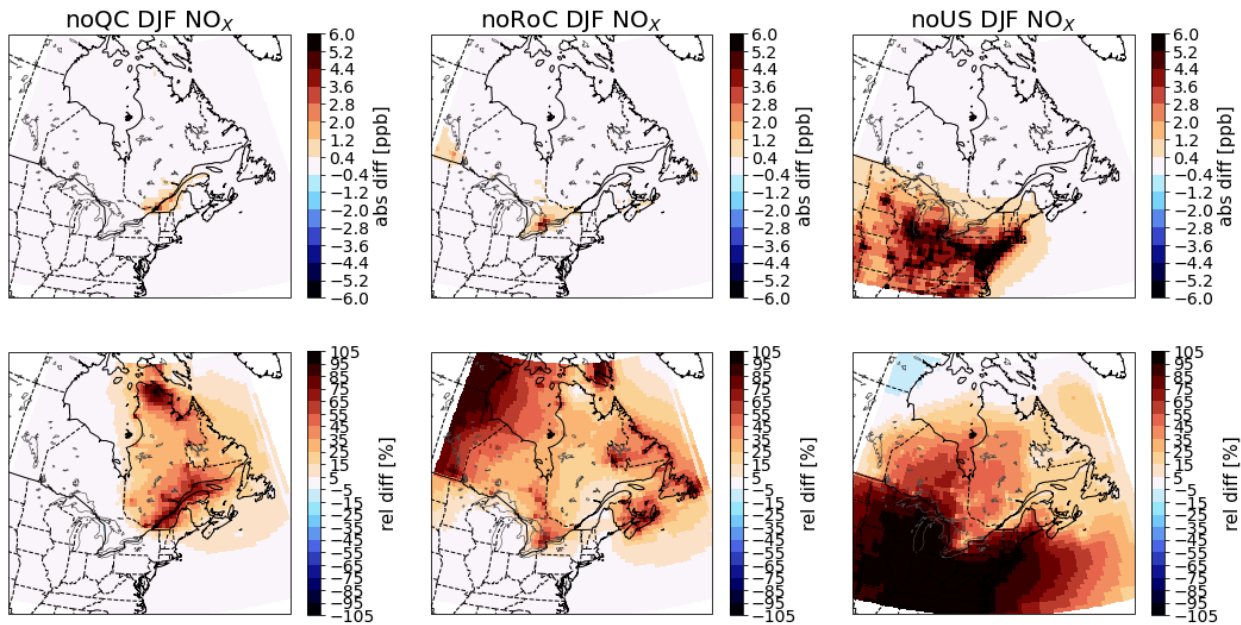

**Figure A5** : Differences in winter surface  $\text{NO}_x$  concentrations between the sensitivity simulations and the base case simulation. Absolute differences are shown in the top row and relative differences in the bottom row. The three columns show the results of the noQC (left), noRoC (center) and noUS (right) sensitivity simulations.

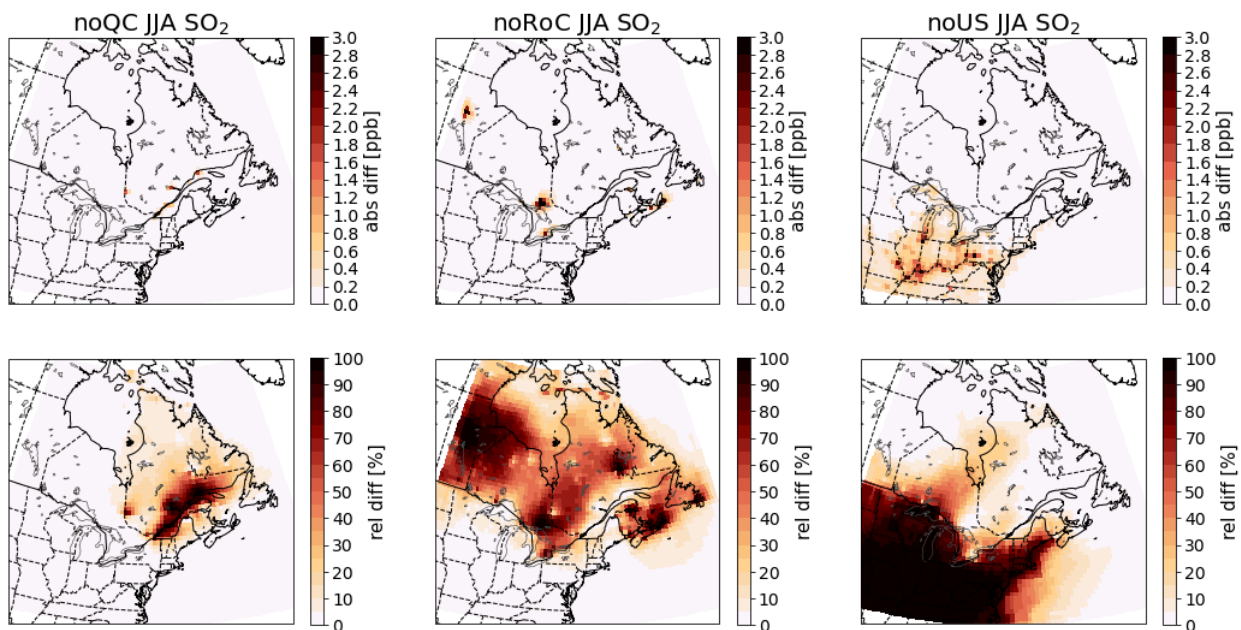

**Figure A6** : Differences in summer surface  $\text{SO}_2$  concentrations between the sensitivity simulations and the base case simulation. Absolute differences are shown in the top row and relative differences in the bottom row. The three columns show the results of the noQC (left), noRoC (center) and noUS (right) sensitivity simulations.



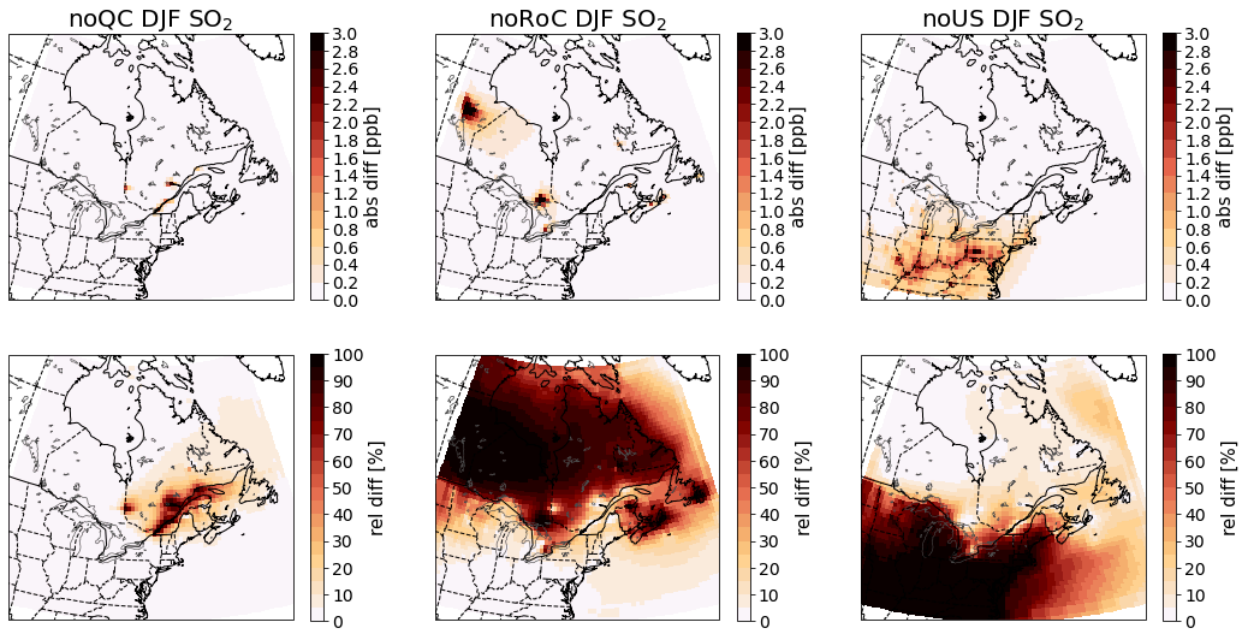

**Figure A7 :** Differences in winter surface  $\text{SO}_2$  concentrations between the sensitivity simulations and the base case simulation. Absolute differences are shown in the top row and relative differences in the bottom row. The three columns show the results of the noQC (left), noRoC (center) and noUS (right) sensitivity simulations.

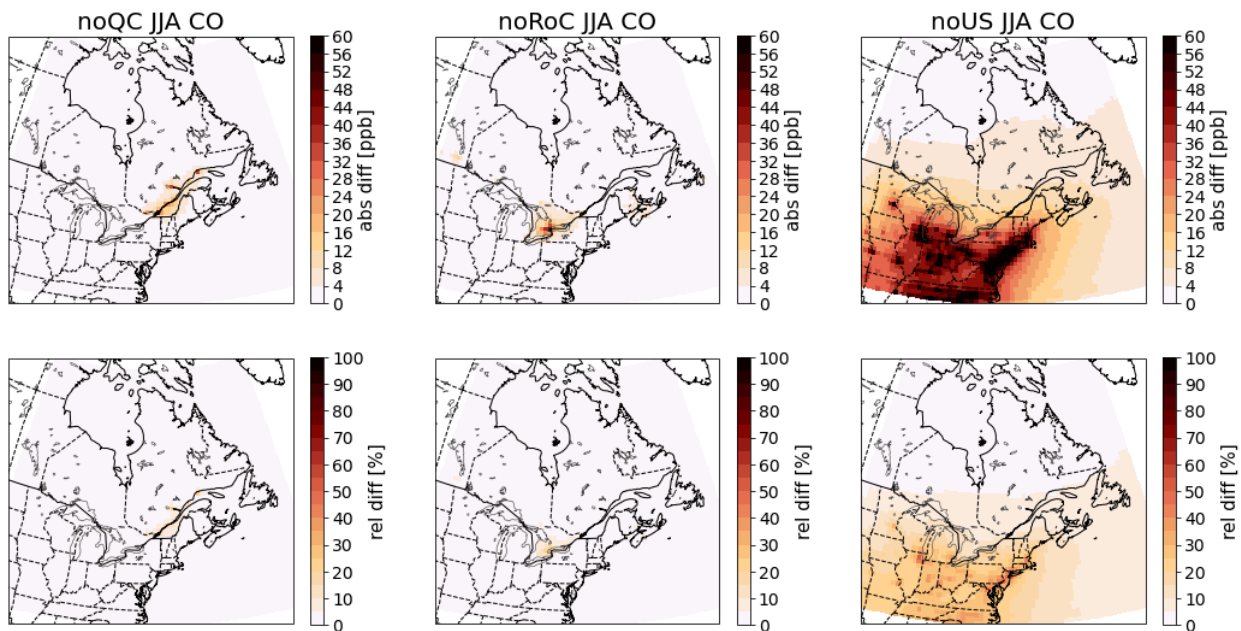

**Figure A8:** Differences in summer surface CO concentrations between the sensitivity simulations and the base case simulation. Absolute differences are shown in the top row and relative differences in the bottom row. The three columns show the results of the noQC (left), noRoC (center) and noUS (right) sensitivity simulations.

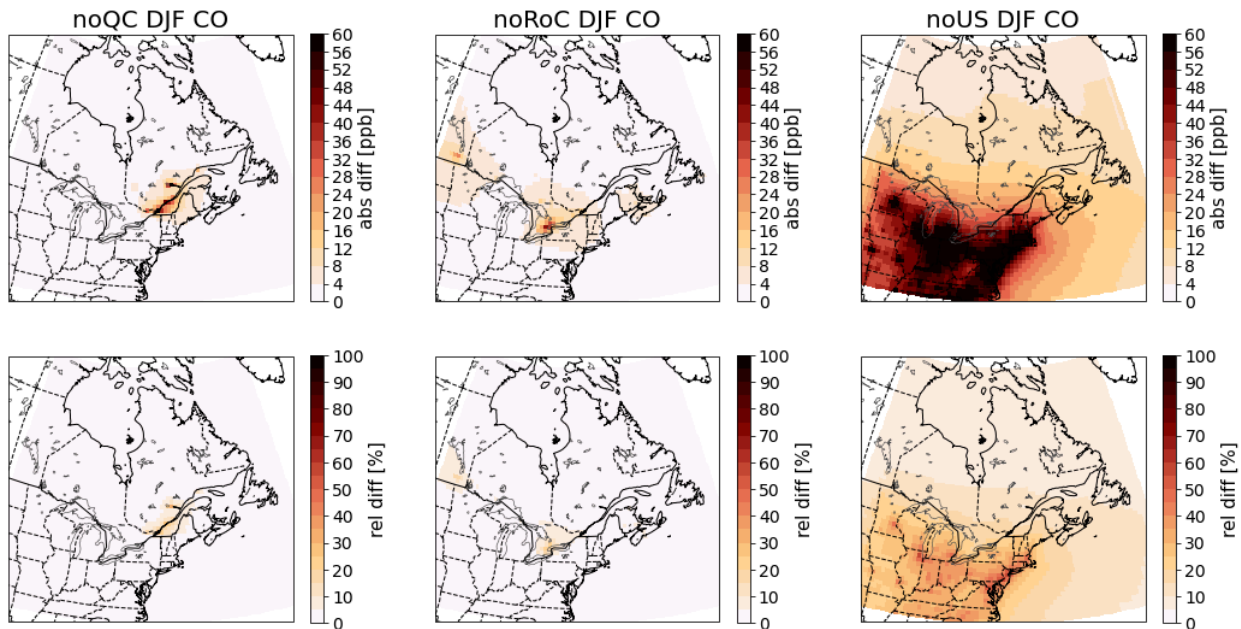

**Figure A9:** Differences in winter surface CO concentrations between the sensitivity simulations and the base case simulation. Absolute differences are shown in the top row and relative differences in the bottom row. The three columns show the results of the noQC (left), noRoC (center) and noUS (right) sensitivity simulations.

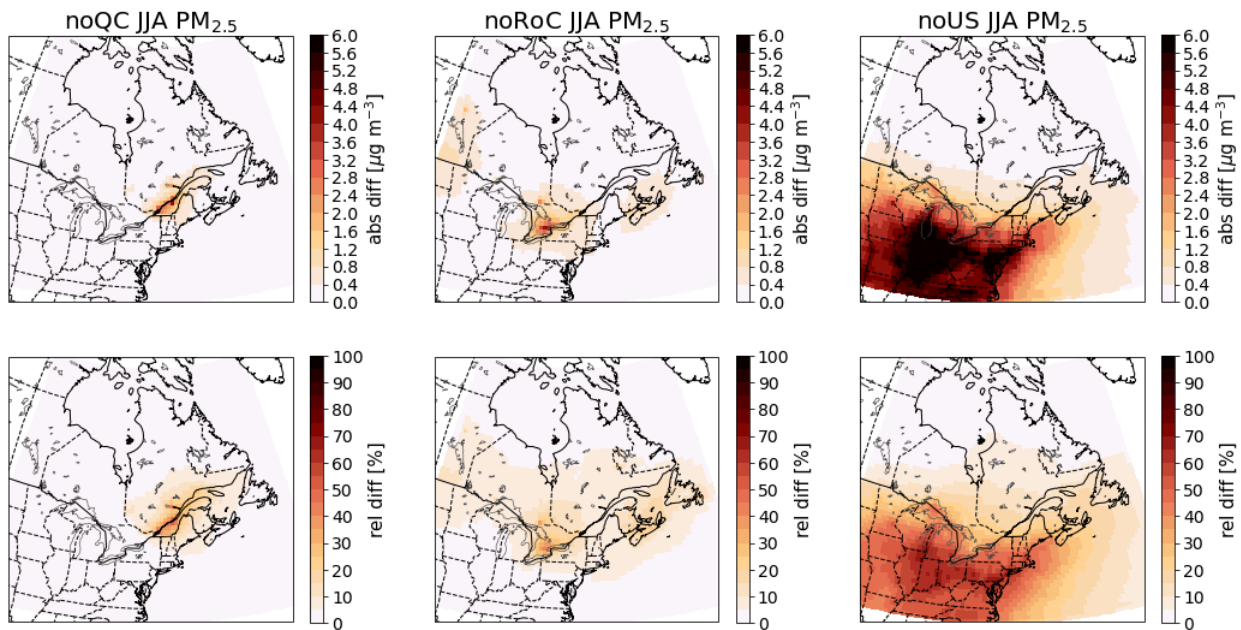

**Figure A10:** Differences in summer surface PM<sub>2.5</sub> concentrations between the sensitivity simulations and the base case simulation. Absolute differences are shown in the top row and relative differences in the bottom row. The three columns show the results of the noQC (left), noRoC (center) and noUS (right) sensitivity simulations.

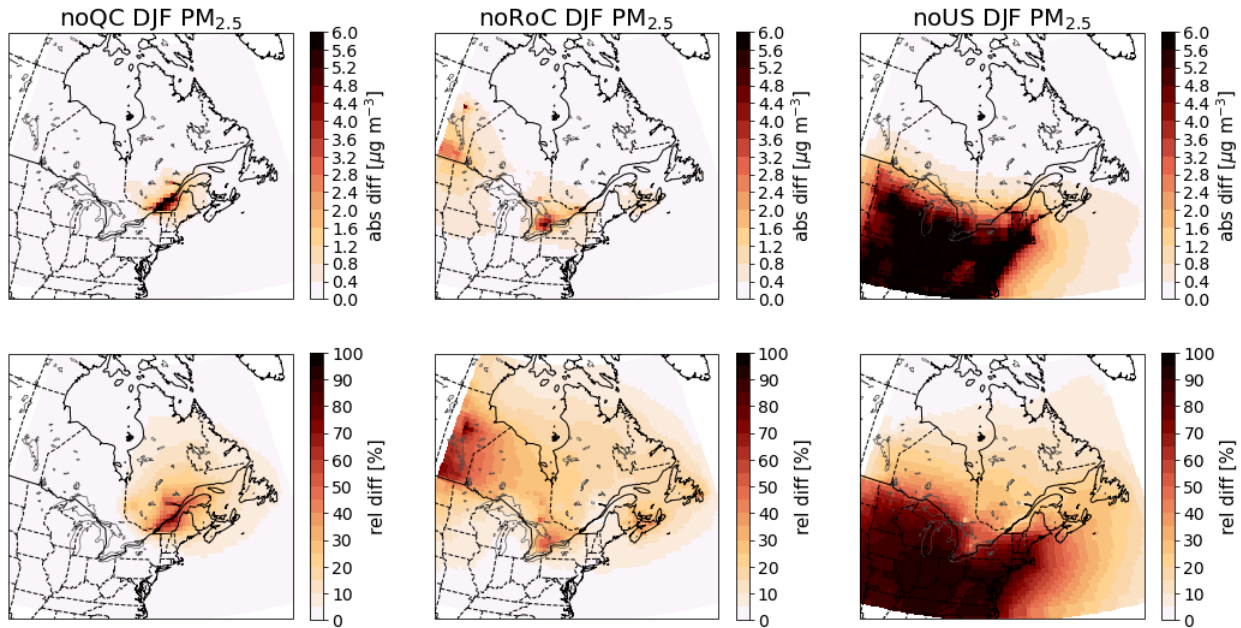

**Figure A11:** Differences in winter surface  $PM_{2.5}$  concentrations between the sensitivity simulations and the base case simulation. Absolute differences are shown in the top row and relative differences in the bottom row. The three columns show the results of the noQC (left), noRoC (center) and noUS (right) sensitivity simulations.

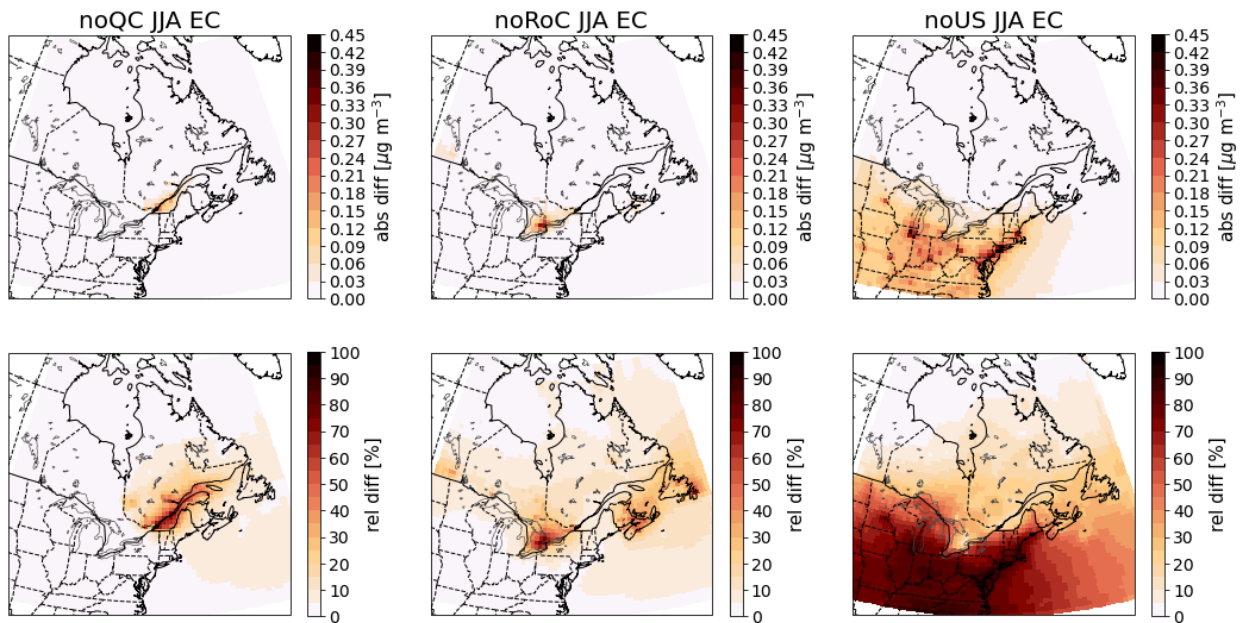

**Figure A12:** Differences in summer surface EC concentrations between the sensitivity simulations and the base case simulation. Absolute differences are shown in the top row and relative differences in the bottom row. The three columns show the results of the noQC (left), noRoC (center) and noUS (right) sensitivity simulations.

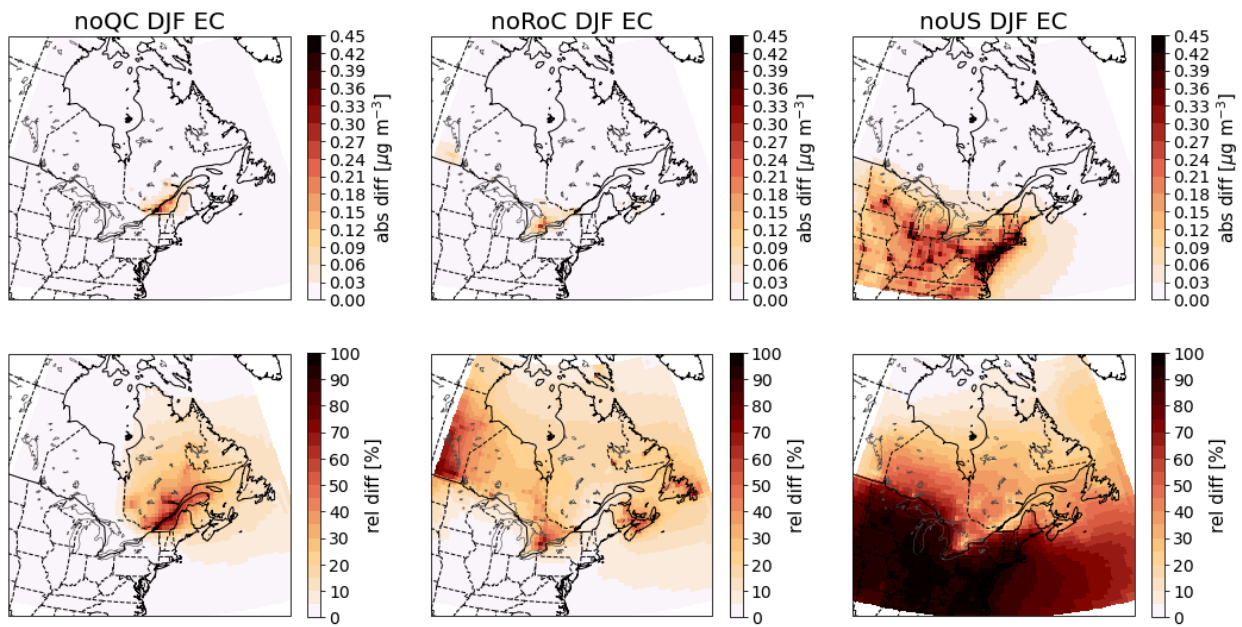

**Figure A13:** Differences in winter surface EC concentrations between the sensitivity simulations and the base case simulation. Absolute differences are shown in the top row and relative differences in the bottom row. The three columns show the results of the noQC (left), noRoC (center) and noUS (right) sensitivity simulations.



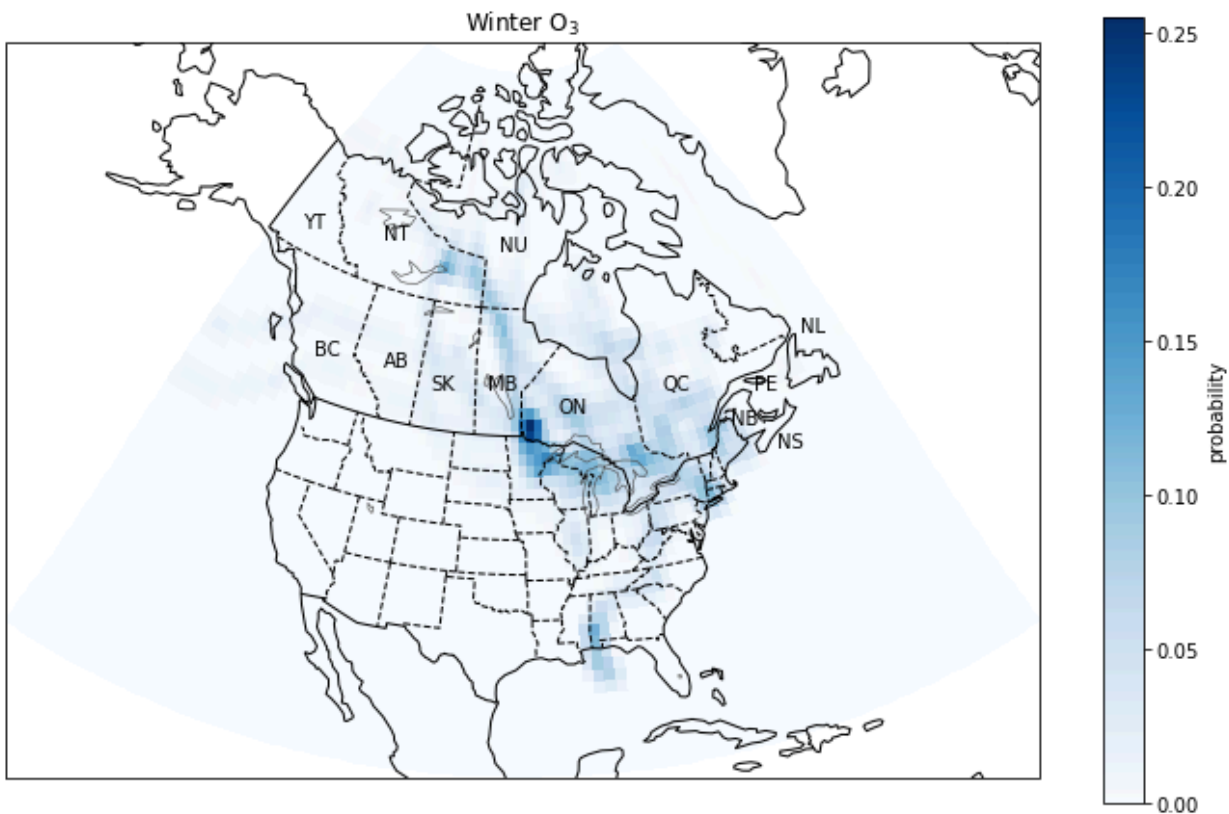

**Figure A14:** Winter probability source contribution function map calculated using the  $O_3$  measurements. Canadian provinces and territories are labeled by postal abbreviation. NL: Newfoundland and Labrador, PE: Prince Edward Island, NS: Nova Scotia, NB: New Brunswick, QC: Quebec, ON: Ontario, MB: Manitoba, SK: Saskatchewan, AB: Alberta, BC: British Columbia, YT: Yukon, NT: Northwest Territories, NU: Nunavut.

In winter, the PSCF map for  $O_3$  shows a medium probability that is widespread over a large territory, including Quebec, Ontario, Manitoba and the northeastern United States. Interestingly, there is a high probability near the Ontario-Manitoba border. According to the National Pollutant Release Inventory (NPRI),<sup>1</sup> a major source of VOCs in this region is the Gimli plant of Diageo Canada Inc., a distillery. This facility is the largest point source of VOCs in Manitoba, but according to the NPRI other point sources also contribute to VOC emissions in this region, including wood product manufacturers and pulp and paper mills. According to the GEOS-Chem modeling, it is possible that ozone production is limited by the relatively low concentrations of VOCs in winter for certain regions in southern Quebec. Thus, transboundary transport of anthropogenic VOCs from outside the province could increase ozone in winter.

#### References:

- 1 Government of Canada, National Pollutant Release Inventory Dashboard, <https://www.canada.ca/en/environment-climate-change/services/national-pollutant-release-inventory/tools-resources-data/all-year-dashboard.html>, (accessed June 27, 2022).
